# Supplementary material for: Fabrication of mechanically robust, self-cleaning and optically high-performance hybrid thin films by SiO2&TiO2double-shelled hollow nanospheres
Source: Royal Society of Chemistry journal article supplement (doi:10.1039/c5nr02467f), 2015-01-01
Supplement: c5nr02467f1.pdf [file c5nr02467f1.pdf]

## Supporting information

### **Fabrication of Mechanically Robust, Self-cleaning and Optically High-performance Hybrid Thin Films by SiO<sub>2</sub>&TiO<sub>2</sub> Double-Shelled Hollow Nanospheres**

Lin Yao<sup>a,b</sup>, Junhui He<sup>a,\*</sup>, Zhi Geng<sup>a,b</sup>, Tingting Ren<sup>a,b</sup>

<sup>a</sup> Functional Nanomaterials Laboratory, Center for Micro/Nanomaterials and Technology, and Key Laboratory of Photochemical Conversion and Optoelectronic Materials, Technical Institute of Physics and Chemistry, Chinese Academy of Sciences, Zhongguancundonglu 29, Haidianqu, Beijing 100190, China.

<sup>b</sup> University of Chinese Academy of Sciences, Beijing 100049, China.

\* Corresponding author. Fax: +86 10 82543535. E-mail address: [jhhe@mail.ipc.ac.cn](mailto:jhhe@mail.ipc.ac.cn).

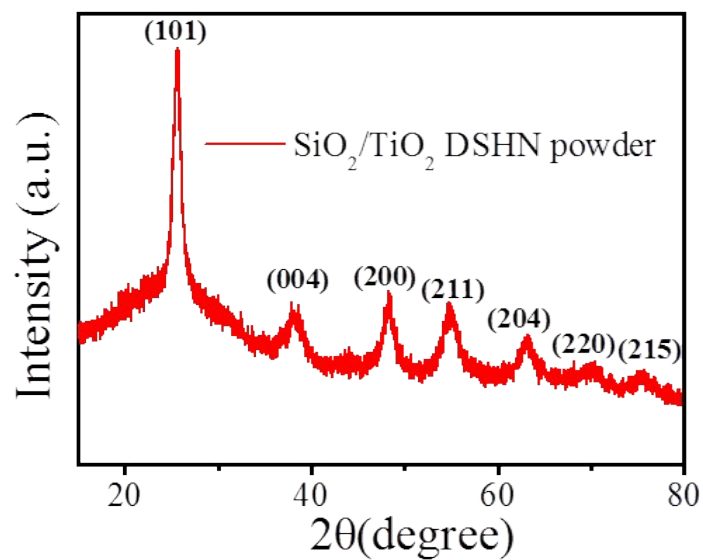

**Figure S1.** X-ray diffraction (XRD) patterns of SiO<sub>2</sub>&TiO<sub>2</sub> DSHN powder.

**Scherrer equation**

$D = 0.89 \lambda / (\beta \cos \theta)$  (1), where  $2\theta$  is the diffraction angle,  $\lambda$  is the wavelength of X-ray radiation, and  $\beta$  is the full width at the half-maximum of the diffraction peak.

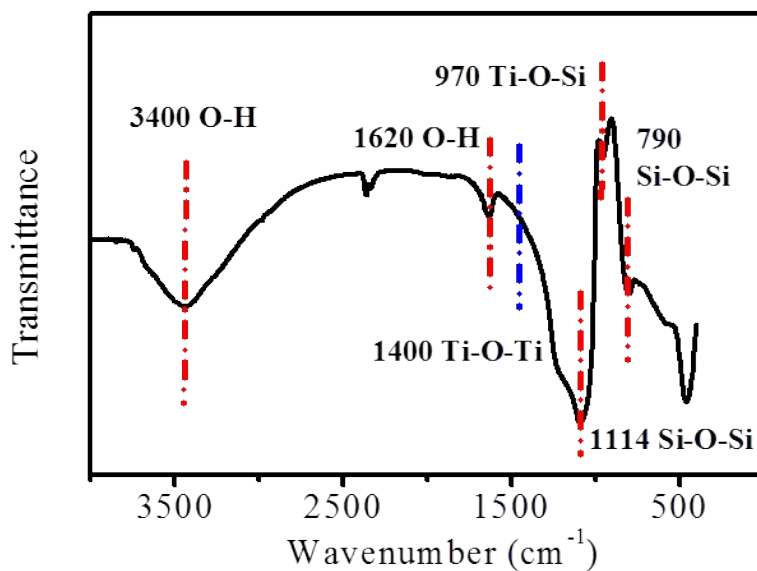

**Figure S2.** IR spectrum of SiO<sub>2</sub>&TiO<sub>2</sub> DSHN powder.

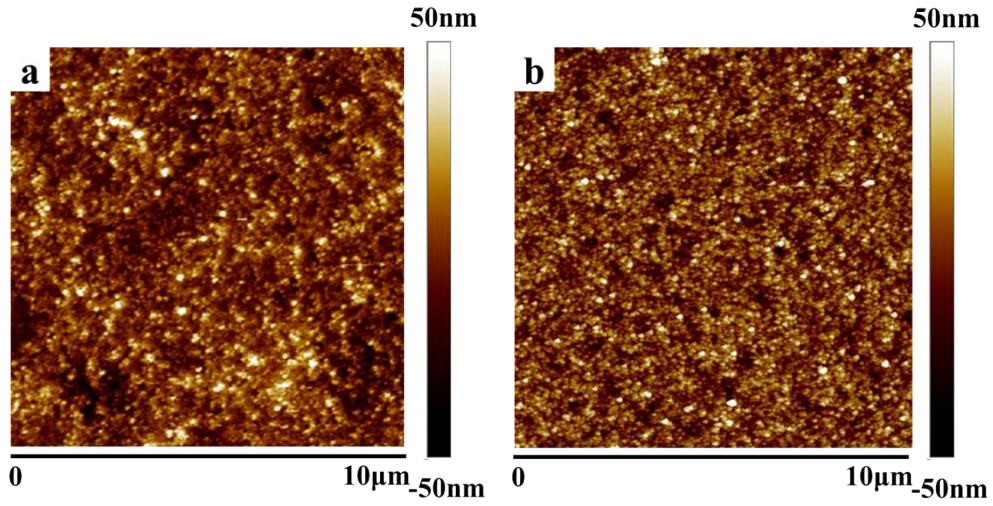

**Figure S3.** AFM images of (a) SiO<sub>2</sub> HN thin film and (b) SiO<sub>2</sub>&TiO<sub>2</sub> DSHN thin film.

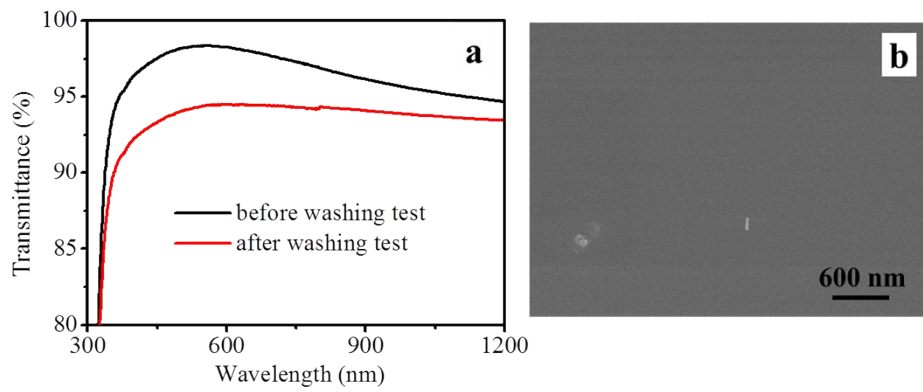

**Figure S4.** (a) Transmission spectra of SiO<sub>2</sub> HN thin film before and after washing test. (b) SEM image of SiO<sub>2</sub> HN thin film after washing test.
